# Supplementary material for: Stabilization of lithium anode with ceramic-rich interlayer for all solid-state batteries
Source: Royal Society of Chemistry journal article supplement (doi:10.1039/d2ra01856j), 2022-01-01
Supplement: d2ra01856j1.pdf [file d2ra01856j1.pdf]

## Supporting information

# Stabilization of Lithium Anode with Ceramic-Rich Interlayer for All Solid-State Batteries

*Nicolas Delaporte<sup>1\*</sup>, Gilles Lajoie<sup>1</sup>, Ali Darwiche<sup>1</sup>, Marie-Josée Vigeant<sup>1</sup>, Steve Collin-Martin<sup>1</sup>, Daniel Clément<sup>1</sup>*

1. Center of Excellence in Transportation, Electrification and Energy Storage, 1806 Bd. Lionel-Boulet, Varennes, QC, Canada.

Corresponding author:

[\\*Delaporte.Nicolas@hydro.qc.ca](mailto:Delaporte.Nicolas@hydro.qc.ca)

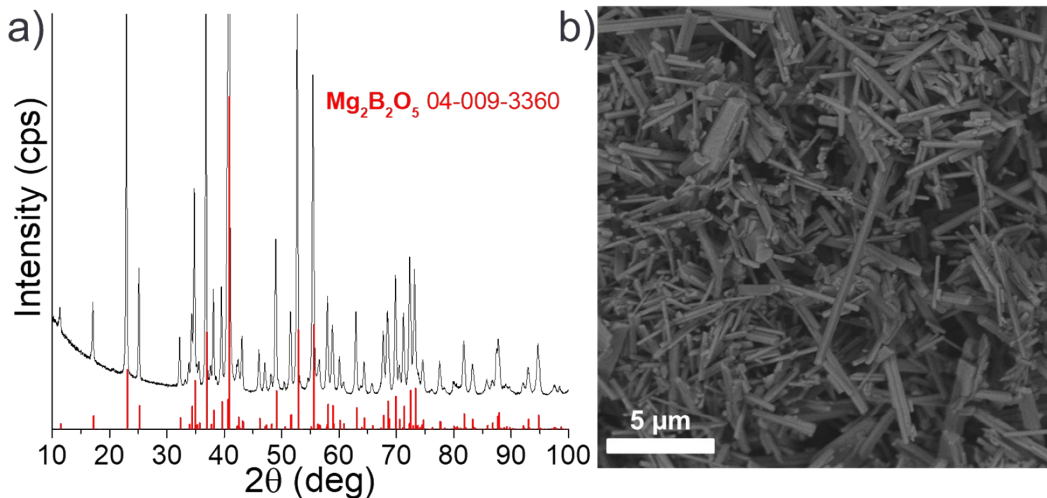

Figure S1. a) XRD pattern and b) SEM image of the  $\text{Mg}_2\text{B}_2\text{O}_5$  powder. The corresponding JCPDS number is given and peaks position with their relative intensities marked with red rods.

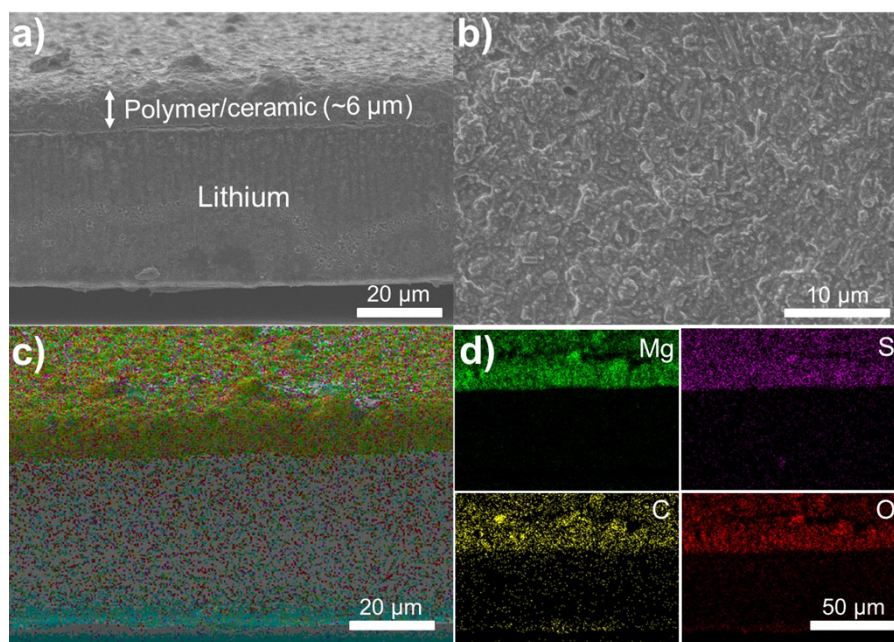

Figure S2. a) SEM cross-section and b) top views of an overcoating of 70% $\text{Mg}_2\text{B}_2\text{O}_5$  (~6  $\mu\text{m}$ ) on the surface of an aged LiAl and the c) corresponding elemental mapping of Mg (green), S (purple), C (yellow) and O (red).

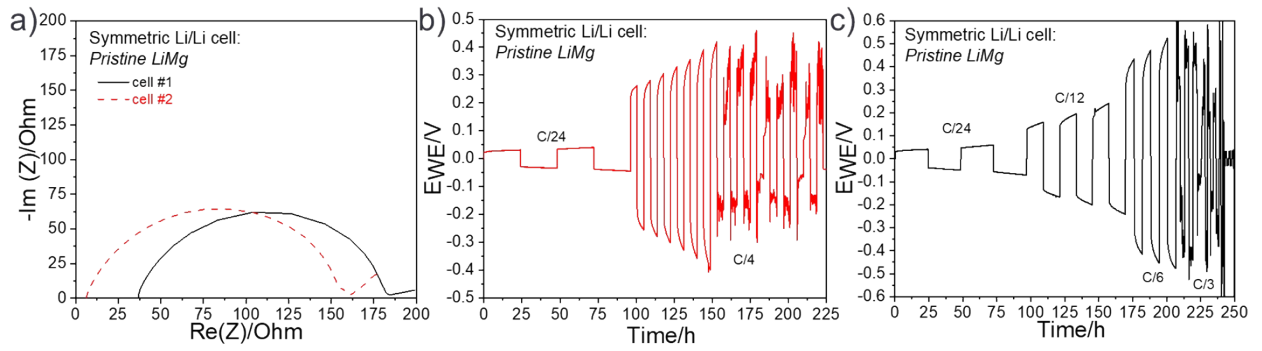

Figure S3. a) Nyquist plots, b) long cycling experiment at a C/4 rate and c) rate capability for symmetric Li/Li cell assembled with two pristine LiMg electrodes and a SPE. Electrochemical measurements were obtained at 50 °C.

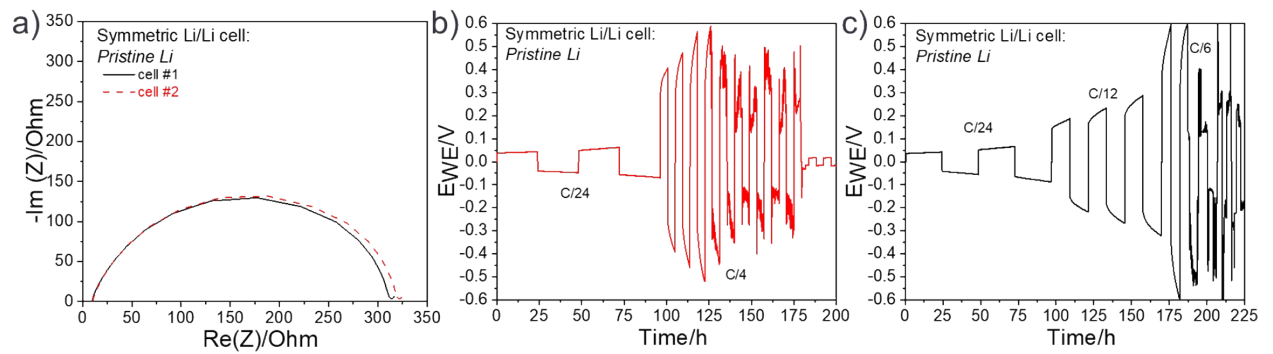

Figure S4. a) Nyquist plots, b) long cycling experiment at a C/4 rate and c) rate capability for symmetric Li/Li cell assembled with two pristine Li electrodes and a SPE. Electrochemical measurements were obtained at 50 °C.

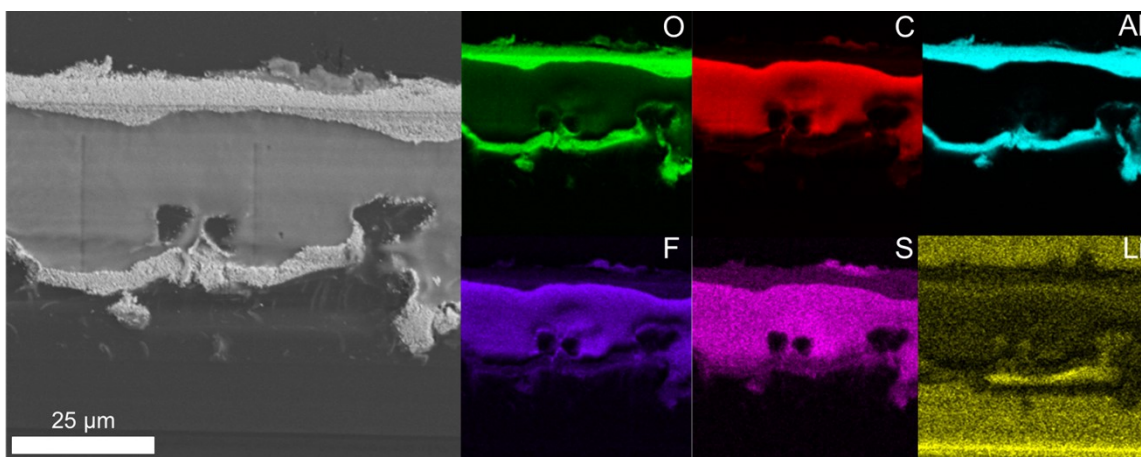

Figure S5. SEM cross-section view and corresponding elemental mapping of a LiAl/SPE/LiAl stack with a  $\sim 4\text{-}\mu\text{m}$  thick  $85\%\text{Al}_2\text{O}_3\text{-sph}$  ceramic layer on the surface of the lithium foils. The cell assembled with this stack was short-circuited and evident traces of dendrites growth are visible.

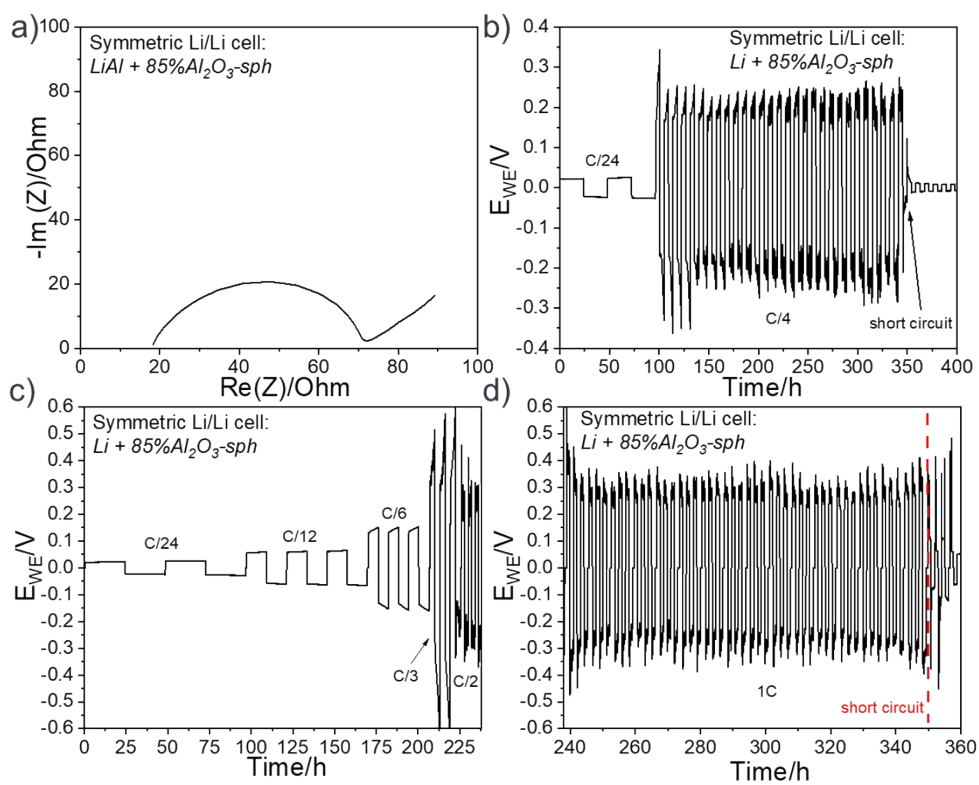

Figure S6. a) Nyquist plot and b) long-term stability experiment at a C/4 rate for a symmetric Li/Li cell assembled with a SPE and two Li electrodes modified with a  $\sim 4\text{-}\mu\text{m}$  thick  $85\%\text{Al}_2\text{O}_3\text{-sph}$  ceramic layer. c) Rate capability for a symmetric Li/Li cell assembled with a SPE and two Li electrodes modified with a  $\sim 4\text{-}\mu\text{m}$  thick  $85\%\text{Al}_2\text{O}_3\text{-sph}$  ceramic layer and d) the subsequent long-term stability experiment at a 1C rate. Electrochemical measurements were obtained at  $50\text{ }^\circ\text{C}$ .

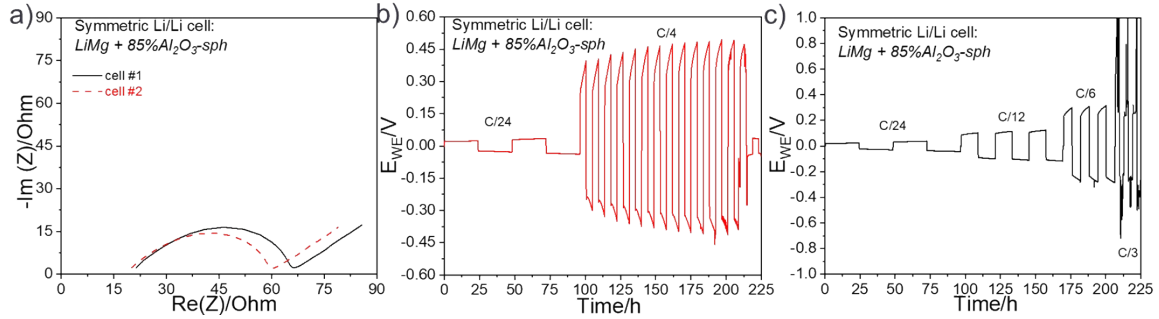

Figure S7. a) Nyquist plots, b) long cycling experiment at a C/4 rate and c) rate capability for symmetric Li/Li cells assembled with a SPE and two LiMg electrodes modified with a  $\sim 4\text{-}\mu\text{m}$  thick  $85\%\text{Al}_2\text{O}_3\text{-sph}$  ceramic layer. Electrochemical measurements were obtained at  $50\text{ }^\circ\text{C}$ .

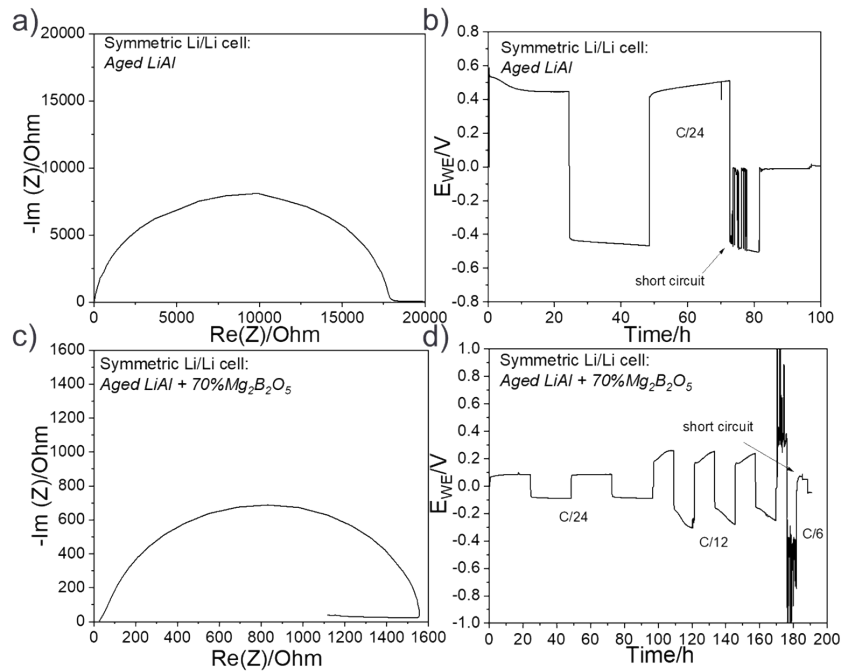

Figure S8. a,c) Nyquist plots and b,d) rate capability for symmetric Li/Li cells assembled with a,b) two aged LiAl electrodes and a SPE and c,d) two aged LiAl electrodes modified with a  $\sim 6\text{-}\mu\text{m}$  thick  $70\%\text{Mg}_2\text{B}_2\text{O}_5$  ceramic layer and a SPE. Electrochemical measurements were obtained at  $50\text{ }^\circ\text{C}$ .

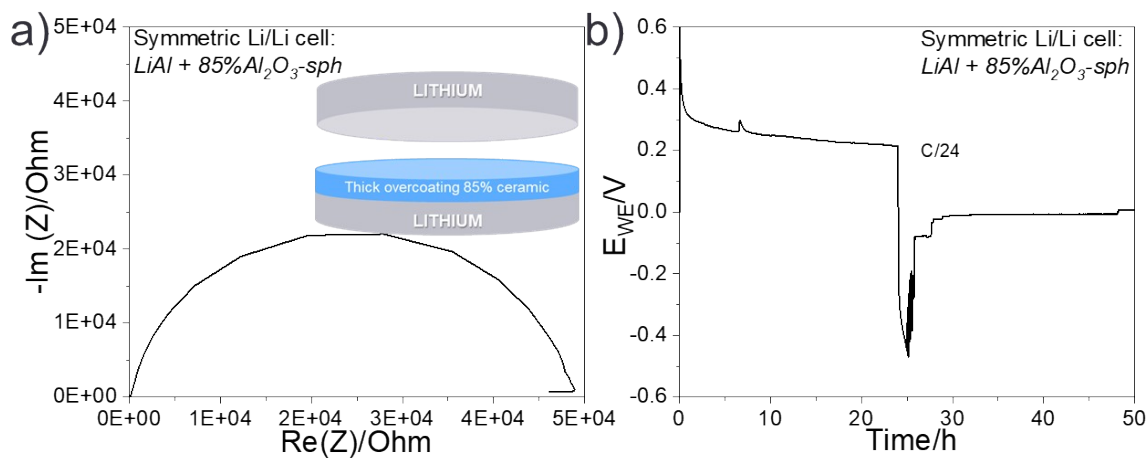

Figure S9. a) Nyquist plot with a schematic representation of the cell assembly and b) first stripping/plating cycle at a C/24 rate for a symmetric Li/Li cell assembled with a pristine LiAl electrode and a LiAl electrode modified with a thick  $85\%\text{Al}_2\text{O}_3\text{-sph}$  ceramic layer ( $\sim 15\text{ }\mu\text{m}$ ). Electrochemical measurements were obtained at  $50\text{ }^\circ\text{C}$ .

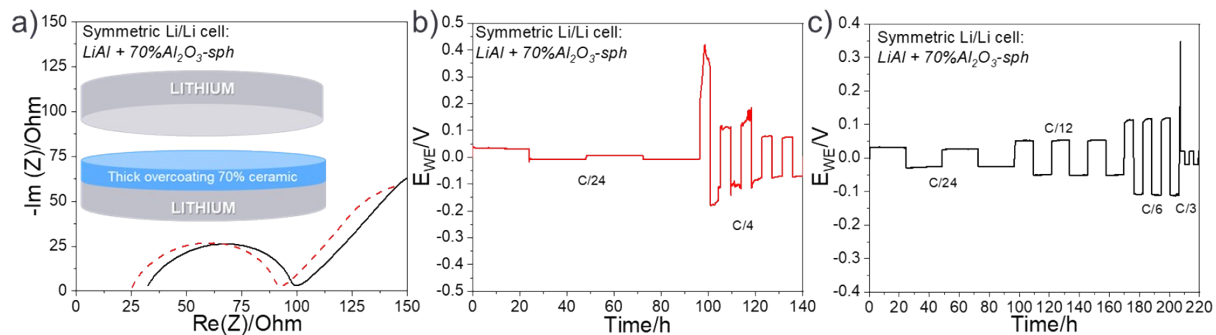

Figure S10. a) Nyquist plots with a schematic representation of the cell assembly, b) long cycling experiment at a C/4 rate and c) rate capability for symmetric Li/Li cells assembled with a pristine LiAl electrode and a LiAl electrode modified with a thick

70%Al<sub>2</sub>O<sub>3</sub>-sph ceramic layer (~15-20 μm). Electrochemical measurements were obtained at 50 °C.

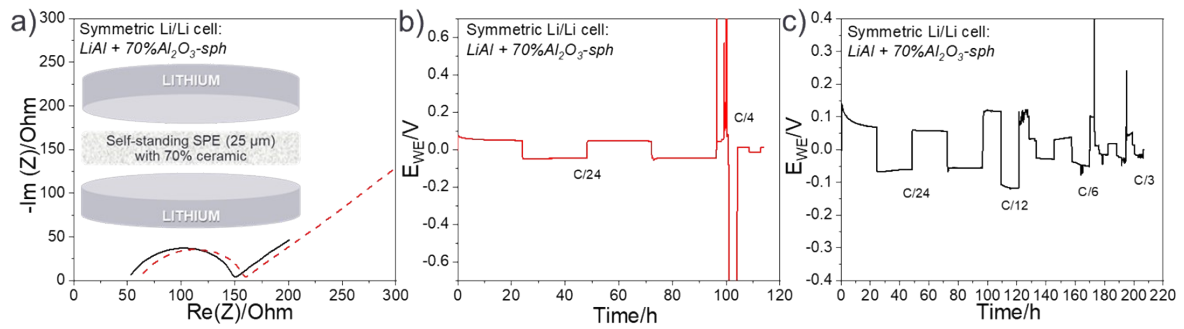

Figure S11. a) Nyquist plots with a schematic representation of the cell assembly, b) long cycling experiment at a C/4 rate and c) rate capability for symmetric Li/Li cells assembled with two pristine LiAl electrodes and a SPE (25 μm) made with 70% of Al<sub>2</sub>O<sub>3</sub>-sph ceramic. Electrochemical measurements were obtained at 50 °C.

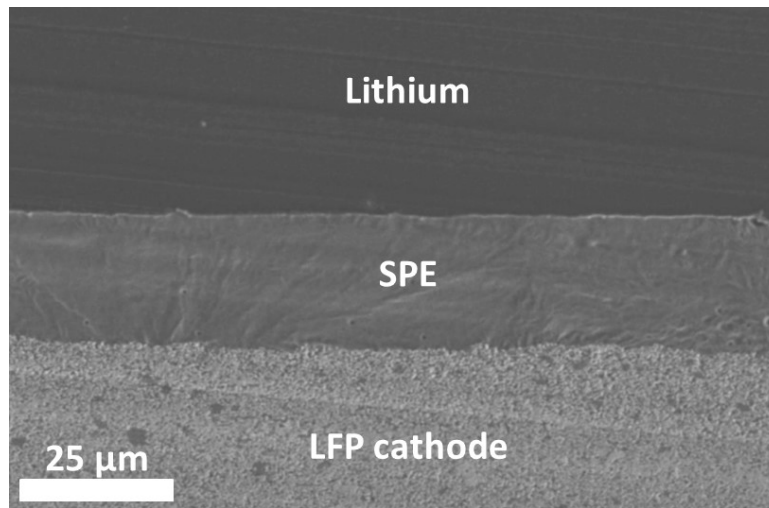

Figure S12. SEM image of the cross-sectional view of LFP/SPE/Li stacking.

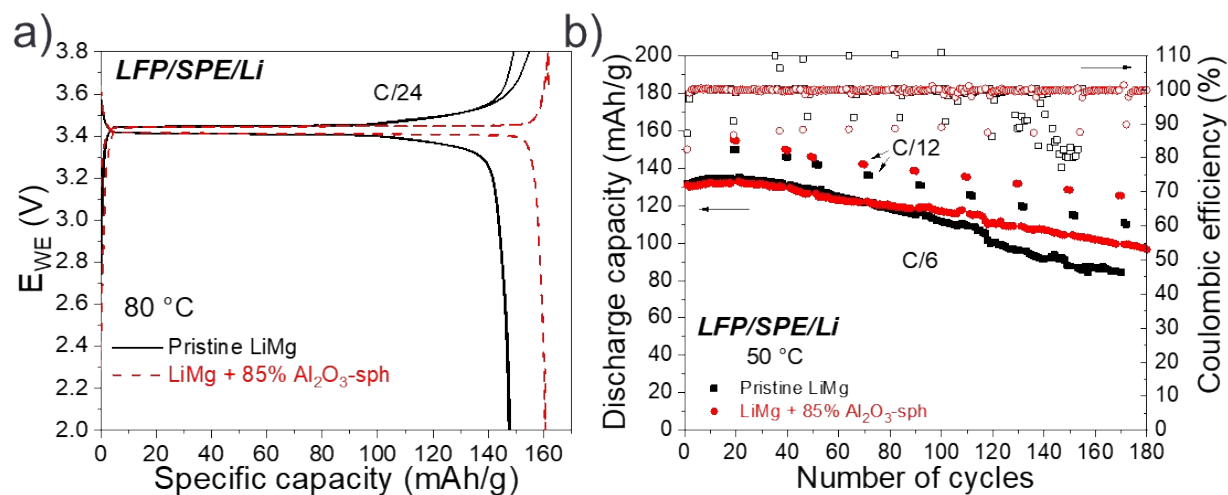

Figure S13. a) Charge/discharge profiles obtained at  $80\text{ }^\circ\text{C}$  for the two first cycles at C/24 and b) long cycling experiments conducted at  $50\text{ }^\circ\text{C}$  with a constant charge/discharge current of C/6 between 2.0 and 3.8 V vs. Li/Li<sup>+</sup> for LFP/SPE/Li batteries made with a pristine LiMg electrode and a modified LiMg electrode with a  $\sim 4\text{-}\mu\text{m}$  thick  $85\%\text{Al}_2\text{O}_3\text{-sph}$  ceramic layer.
